# Supplementary material for: The Effects of Chinese Medicine QRD, Antibiotics, and Probiotics on Therapy and Gut Microbiota in Septic Rats
Source: Front Cell Infect Microbiol. 2021 Oct 14;11:712028. doi: 10.3389/fcimb.2021.712028 (PMC8552555; doi:10.3389/fcimb.2021.712028)
Supplement: Supplementary Table S1 — The relative abundance of phylum and genera identified in all samples. [file Table_1.xlsx]

## Sheet: phylum
Taxonomy	D1	D2	D3	D4	D5	D6	D7	D8	D9	D10	P1	P2	P3	P4	P5	P6	P7	P8	P9	P10	S1	S2	S3	S4	S5	S6	S7	S8	S9	S10	Y1	Y2	Y3	Y4	Y5	Y6	Y7	Y8	Y9	Y10	Z1	Z2	Z3	Z4	Z5	Z6	Z7	Z8	Z9
Actinobacteria	0.000359454	0.00143781	0.00053918	0.00125809	0.000718907	0.000359454	0.00107836	0.000359454	0.00125809	0.00053918	0.00125809	0.000718907	0.00305536	0.000718907	0.00179727	0.000359454	0.00161754	0.000359454	0.00053918	0.000359454	0.00053918	0.00053918	0.000359454	0.00053918	0	0	0.000359454	0.00107836	0.000359454	0.000179727	0.000718907	0.000179727	0.000179727	0	0.000359454	0.000179727	0.000898634	0.00233645	0.000179727	0.000359454	0.000359454	0.000179727	0.000718907	0.000359454	0.00053918	0.00251618	0.00053918	0.00053918	0.00197699
Bacteroidetes	0.431704	0.574766	0.478792	0.661215	0.661215	0.589863	0.57243	0.595075	0.40133	0.419842	0.073688	0.0291157	0.00107836	0.0469087	0.00395399	0.00413372	0.0918404	0.00143781	0.00053918	0.00880661	0.433861	0.397915	0.514558	0.466391	0.580158	0.516175	0.536844	0.707764	0.40762	0.524802	0.582315	0.367901	0.615924	0.599748	0.749101	0.639827	0.532171	0.589684	0.384795	0.305356	0.36826	0.504853	0.450036	0.396477	0.462257	0.381201	0.325306	0.335191	0.247484
Cyanobacteria	0	0.00215672	0.00431344	0.00053918	0.000718907	0.000898634	0.000179727	0	0.00341481	0	0.00197699	0.00125809	0.000359454	0.00341481	0.000179727	0.000179727	0.0294752	0	0.00053918	0.00125809	0.00107836	0.0104242	0.00179727	0.00700935	0.0026959	0.0203091	0.0113228	0.0154565	0.0318116	0.00772825	0.00197699	0.000359454	0.00143781	0.0026959	0	0.000359454	0.0046729	0.0046729	0.000898634	0	0.0102444	0.00377426	0.00988497	0.00934579	0.00395399	0.0165349	0.0203091	0.00862689	0.0107836
Deferribacteres	0.000179727	0.0420561	0.109633	0.00107836	0.00754853	0.00700935	0.00179727	0	0.0046729	0.000179727	0.00125809	0.000179727	0	0	0	0	0	0	0.000179727	0	0.00772825	0.00287563	0.00934579	0.00395399	0.00197699	0.0327103	0.0359454	0.00305536	0.0132998	0.0073688	0.0053918	0.00970525	0.0115025	0.00970525	0.000179727	0.0274982	0.017793	0.0316319	0.000179727	0.000359454	0.0053918	0.0053918	0.00431344	0.000718907	0.00107836	0.00053918	0.000718907	0.000898634	0.000359454
Elusimicrobia	0	0	0	0.000179727	0	0	0	0	0	0	0	0	0	0	0	0	0	0	0	0	0	0	0	0	0	0	0	0	0	0	0	0	0	0.000359454	0	0.000179727	0	0	0	0	0	0	0	0.000179727	0	0	0	0	0
Firmicutes	0.158519	0.29619	0.186556	0.277498	0.222142	0.284687	0.21711	0.147196	0.174694	0.273185	0.193566	0.143063	0.172897	0.267074	0.0945363	0.279295	0.311107	0.228073	0.132998	0.218548	0.221783	0.48652	0.194285	0.416427	0.350647	0.226995	0.114306	0.197699	0.360532	0.357297	0.361071	0.328541	0.255572	0.262761	0.169123	0.24317	0.260604	0.287203	0.478792	0.433501	0.476276	0.399173	0.450036	0.51959	0.478792	0.530014	0.567937	0.583393	0.652408
Lentisphaerae	0	0.000359454	0	0	0	0	0	0.000179727	0.000359454	0	0	0	0	0	0	0	0	0	0	0	0	0	0	0	0	0.00053918	0	0	0.000359454	0	0.000179727	0	0	0	0	0	0	0.000359454	0	0	0	0	0	0.000179727	0	0	0	0	0
Proteobacteria	0.406362	0.0632638	0.212078	0.0505032	0.0938174	0.108555	0.201114	0.254134	0.408879	0.304457	0.709022	0.823688	0.816319	0.676492	0.891625	0.694105	0.557872	0.766715	0.860532	0.766715	0.328361	0.0833932	0.26941	0.0797987	0.055895	0.182602	0.241733	0.0699137	0.163372	0.0846513	0.0379224	0.28954	0.11197	0.11179	0.0785406	0.0833932	0.162832	0.0700935	0.129224	0.258807	0.11826	0.0700935	0.0715313	0.0465492	0.0402588	0.0580518	0.048706	0.0582315	0.061826
Saccharibacteria	0	0.000898634	0.000359454	0	0.00233645	0.00143781	0	0	0	0.000359454	0.00251618	0.00053918	0.000359454	0.00161754	0.00413372	0	0.00251618	0.000359454	0.000718907	0	0.000359454	0.00521208	0.000718907	0.00557153	0.00143781	0.0026959	0.000898634	0.000179727	0.00251618	0.00197699	0.00287563	0	0	0.000718907	0	0	0.0026959	0.00197699	0	0.000359454	0.00125809	0.00161754	0.00179727	0.00233645	0.00233645	0.00179727	0.00359454	0.00395399	0.00395399
Tenericutes	0.000898634	0.00718907	0.00629044	0.00377426	0.00413372	0.00251618	0.00377426	0.000359454	0.00233645	0	0.00287563	0.00053918	0.00179727	0.00107836	0.000718907	0.00916607	0.00287563	0.000898634	0.000359454	0.00287563	0.00125809	0.00593098	0.00215672	0.00700935	0.0026959	0.00880661	0.00251618	0.00053918	0.00880661	0.00521208	0.00215672	0.00215672	0	0.00844716	0.000179727	0.00179727	0.00808771	0.00664989	0.00125809	0	0.00485262	0.0120417	0.00575126	0.00629044	0.00862689	0.00449317	0.00664989	0.00287563	0.00323508
Unclassified	0.00161754	0.00682962	0.00125809	0.00287563	0.00575126	0.0046729	0.00179727	0.0026959	0.00305536	0.00143781	0.013839	0.000898634	0.00413372	0.0026959	0.00305536	0.0127606	0.00251618	0.00215672	0.00359454	0.00143781	0.00503235	0.00718907	0.00449317	0.0131201	0.00431344	0.00898634	0.0557153	0.00359454	0.0113228	0.0104242	0.00521208	0.00161754	0.00341481	0.00359454	0.00251618	0.00359454	0.00952552	0.0053918	0.00359454	0.00125809	0.00395399	0.0026959	0.00413372	0.00323508	0.00161754	0.00449317	0.00485262	0.00485262	0.00233645
Verrucomicrobia	0.000359454	0.00485262	0.000179727	0.00107836	0.00161754	0	0.000718907	0	0	0	0	0	0	0	0	0	0.000179727	0	0	0	0	0	0.00287563	0.000179727	0.000179727	0.000179727	0.000359454	0.000718907	0	0.000359454	0.000179727	0	0	0.000179727	0	0	0.000718907	0	0.00107836	0	0.0111431	0.000179727	0.00179727	0.0147376	0.00053918	0.000359454	0.0213875	0.00143781	0.0156362
[truncated: 1 more columns]

## Sheet: genus
Taxonomy	D1	D2	D3	D4	D5	D6	D7	D8	D9	D10	P1	P2	P3	P4	P5	P6	P7	P8	P9	P10	S1	S2	S3	S4	S5	S6	S7	S8	S9	S10	Y1	Y2	Y3	Y4	Y5	Y6	Y7	Y8	Y9	Y10	Z1	Z2	Z3	Z4	Z5	Z6	Z7	Z8	Z9
[Eubacterium]_coprostanoligenes_group	0.00215672	0.00305536	0.00629044	0.00197699	0.00341481	0.00485262	0.00682962	0.00161754	0.00197699	0	0.000359454	0	0	0.00053918	0	0	0	0	0	0	0.0107836	0.00413372	0.00916607	0.00413372	0.00215672	0.00449317	0.00215672	0.00125809	0.00413372	0.00287563	0.0109633	0.00197699	0.000179727	0.0102444	0	0.00251618	0.00161754	0.00125809	0.00377426	0	0.00718907	0.0124012	0.00413372	0.017793	0.00718907	0.00629044	0.00215672	0.0156362	0.00988497
[Eubacterium]_nodatum_group	0.000718907	0.00215672	0.000898634	0.00790798	0.00233645	0.000179727	0.000718907	0.00215672	0.000179727	0	0	0	0	0.00053918	0	0	0	0	0	0	0	0	0	0.000359454	0	0	0.00161754	0.000179727	0	0	0	0.000179727	0	0	0	0.00107836	0.000359454	0.0053918	0.000179727	0.000179727	0.000179727	0	0	0.00053918	0.00053918	0.000359454	0	0.000359454	0
[Eubacterium]_ventriosum_group	0	0	0	0	0	0	0	0	0	0	0	0	0	0	0	0	0	0	0	0	0	0	0	0.000359454	0	0	0	0	0.000179727	0	0	0	0	0	0	0	0	0	0	0	0	0	0	0	0	0	0	0.000179727	0.000179727
Acetatifactor	0	0	0	0	0	0	0	0	0	0	0	0	0	0	0	0	0	0	0	0	0	0	0	0.000179727	0.000359454	0	0	0	0.000179727	0	0	0	0	0.00053918	0	0	0	0	0	0	0	0	0.000179727	0.00053918	0.000179727	0.000179727	0.000359454	0.000179727	0.000179727
Acinetobacter	0	0	0	0	0	0	0	0	0	0	0.000179727	0	0	0	0	0.000179727	0	0	0	0	0	0	0	0	0	0	0	0	0	0	0	0	0	0	0	0	0	0	0	0	0	0	0	0	0	0	0	0	0
Actinomyces	0	0	0	0	0	0	0.000179727	0	0	0	0.000179727	0.000179727	0.000179727	0.000179727	0.000898634	0.000179727	0.000718907	0	0	0.000179727	0	0	0	0	0	0	0	0	0	0	0	0	0	0	0	0.000179727	0	0	0	0	0	0	0	0	0	0	0	0	0
Aerococcus	0	0	0	0	0	0	0	0	0	0	0	0	0	0	0.00107836	0	0	0	0	0	0	0	0	0	0	0	0	0	0	0	0	0	0	0	0	0	0	0	0.000179727	0	0	0	0	0	0	0.000179727	0.000359454	0	0.000179727
Akkermansia	0.000359454	0.00485262	0.000179727	0.00107836	0.00161754	0	0.000718907	0	0	0	0	0	0	0	0	0	0.000179727	0	0	0	0	0	0.00287563	0.000179727	0.000179727	0.000179727	0.000359454	0.000718907	0	0.000359454	0	0	0	0.000179727	0	0	0.000718907	0	0.00107836	0	0.0111431	0.000179727	0.00179727	0.0147376	0.00053918	0.000359454	0.0213875	0.00143781	0.0156362
Alistipes	0.00107836	0.0179727	0.0026959	0.0797987	0.0111431	0.0102444	0.00179727	0.00413372	0.00233645	0.00341481	0.000898634	0.000179727	0	0.000898634	0	0.000179727	0.00107836	0.000179727	0	0.000359454	0.00053918	0.0125809	0.00700935	0.00754853	0.0109633	0.00880661	0.00718907	0.00664989	0.00988497	0.0102444	0.0260604	0.0102444	0.00952552	0.00107836	0.00287563	0.0167146	0.0458303	0.0465492	0.00485262	0.00790798	0.0140187	0.00952552	0.0109633	0.0181524	0.00521208	0.00844716	0.00413372	0.00143781	0.000898634
Allobaculum	0.00503235	0.00682962	0.0046729	0.00503235	0.00593098	0.00233645	0.00970525	0.00251618	0.0104242	0.000179727	0.000718907	0.000179727	0.000179727	0.00125809	0.00053918	0	0.000359454	0	0.00143781	0	0.00251618	0.00647017	0.00593098	0	0	0	0.00125809	0.00611071	0.00377426	0.000179727	0.00305536	0.000898634	0	0.00125809	0	0.00287563	0.00431344	0.00179727	0.000718907	0	0	0.000898634	0.0026959	0.000359454	0.000359454	0.000359454	0.000359454	0.000359454	0
Alloprevotella	0	0.000179727	0.000179727	0.0303738	0.00449317	0.00826743	0	0.0163551	0.000718907	0	0.00305536	0.00107836	0	0	0	0.000179727	0.000179727	0	0.000179727	0	0.00485262	0.00377426	0.0131201	0.00485262	0.0283968	0.00664989	0.00647017	0.000898634	0.00305536	0.0188713	0.00413372	0	0	0.00377426	0.0136592	0	0.0228253	0.021028	0.00053918	0.000359454	0.0199497	0.0176132	0.00449317	0.0183321	0.0325306	0	0.0179727	0.00521208	0.00485262
Anaeroplasma	0.00053918	0.000359454	0.000359454	0.00197699	0.00143781	0.00107836	0	0.000179727	0.00107836	0	0	0	0	0	0	0	0	0	0	0	0.000718907	0.00143781	0	0.000359454	0	0.000718907	0.00143781	0	0.00215672	0.00053918	0.000179727	0	0	0.000359454	0.000179727	0.00053918	0.00341481	0.00377426	0	0	0.000359454	0.000179727	0.000179727	0	0	0	0	0.000179727	0
Anaerotruncus	0.00125809	0.00251618	0.00341481	0.000359454	0.00251618	0.00323508	0.00251618	0.00179727	0.00107836	0.00143781	0.000359454	0	0	0	0	0	0.000179727	0	0	0.000179727	0.00125809	0.00305536	0.00251618	0.00359454	0.0026959	0.000718907	0.000898634	0.00107836	0.0046729	0.00287563	0.00557153	0.00395399	0.00125809	0.000718907	0.000718907	0.00161754	0.00305536	0.00143781	0.00125809	0.00611071	0.00359454	0.00431344	0.00449317	0.00413372	0.00233645	0.00323508	0.00754853	0.00700935	0.00772825
Asteroleplasma	0	0.000179727	0	0	0.000179727	0	0	0	0	0	0	0	0	0	0	0	0	0	0	0	0	0	0	0	0	0.000179727	0	0	0	0	0.000179727	0	0	0	0	0	0.000359454	0.000179727	0	0	0	0	0.000179727	0	0	0	0	0	0
Atopostipes	0	0.000179727	0	0	0	0	0	0	0	0	0	0	0	0	0	0	0	0	0	0	0	0	0	0	0	0	0	0	0	0	0	0	0	0	0	0	0	0	0	0	0	0	0	0	0	0	0	0	0
Avibacterium	0	0	0	0	0	0	0	0	0	0	0	0	0	0	0	0	0	0	0	0	0	0	0.000179727	0	0	0	0	0	0	0	0	0	0	0	0	0	0	0	0	0	0	0	0	0	0	0	0	0	0
Bacillus	0	0	0	0	0	0	0	0	0	0	0	0	0	0	0.000179727	0	0	0	0	0	0	0	0	0	0	0	0	0	0	0	0	0	0	0	0	0	0	0	0	0	0	0	0	0	0	0	0	0	0
Bacteroides	0.212617	0.0718907	0.249101	0.0819554	0.0754853	0.18422	0.285945	0.319015	0.176671	0.375809	0.0203091	0.00611071	0.000179727	0.00053918	0.000359454	0.00125809	0.00179727	0.000179727	0	0.000718907	0.194824	0.0623652	0.104242	0.0763839	0.0301941	0.0801582	0.129224	0.0260604	0.0544572	0.0377426	0.175773	0.0925593	0.10496	0.124371	0.546729	0.156362	0.0607477	0.124191	0.0364845	0.194105	0.0474479	0.0393602	0.017793	0.0357656	0.0237239	0.023005	0.00700935	0.0046729	0.00862689
Barnesiella	0.000898634	0.000179727	0.00125809	0	0.000179727	0.000359454	0.000718907	0.00143781	0	0	0	0	0	0.000179727	0	0	0.000359454	0	0	0	0.000179727	0.000179727	0.000359454	0.00053918	0.000718907	0	0.000898634	0.00053918	0.000179727	0.00053918	0.00107836	0	0.000179727	0	0.000179727	0.00053918	0.00107836	0.00215672	0.000359454	0	0.000718907	0.00053918	0.000718907	0.000179727	0.000898634	0.000359454	0.000898634	0.000718907	0.000359454
Bifidobacterium	0	0.000359454	0	0.000359454	0.000179727	0	0	0.000179727	0.000179727	0	0.00053918	0	0.000179727	0.000179727	0	0	0	0.000179727	0.000179727	0.000179727	0	0	0	0	0	0	0	0.000718907	0	0	0	0.000179727	0.000179727	0	0.000179727	0	0.00053918	0	0	0	0	0.000179727	0	0.000179727	0	0	0	0	0
Bilophila	0	0.00179727	0.000179727	0.000179727	0.0026959	0.00179727	0.000359454	0.0206686	0.000718907	0	0.000179727	0	0	0	0	0	0	0	0	0	0	0.00197699	0.000179727	0.000179727	0.000718907	0.000179727	0.00053918	0.000359454	0.00053918	0.000898634	0.00107836	0	0.000898634	0.000359454	0.00359454	0.000359454	0.000179727	0.00161754	0	0.00395399	0.00125809	0	0.00143781	0.000718907	0	0.000179727	0.000718907	0.000898634	0.00233645
Blautia	0.00053918	0	0.000898634	0	0	0	0.000359454	0	0.000359454	0	0	0	0	0	0	0	0.000179727	0	0	0	0	0.000179727	0.000179727	0	0.000179727	0.000179727	0.00107836	0.000898634	0.000359454	0	0	0.000359454	0.00053918	0.000179727	0	0	0	0.000359454	0.00143781	0.0145579	0	0	0.000898634	0.000359454	0	0.000179727	0.000179727	0.000359454	0.000359454
Brachybacterium	0	0	0.000179727	0	0	0	0	0	0	0	0	0	0	0	0	0	0	0	0	0	0	0	0	0	0	0	0	0	0	0	0	0	0	0	0	0	0	0	0	0	0	0	0	0	0	0	0	0	0
Butyricicoccus	0	0	0	0	0	0	0	0.000179727	0	0.000179727	0	0	0	0	0	0	0	0	0	0	0	0	0	0	0	0	0	0	0	0	0	0	0	0	0	0	0	0	0	0	0	0	0	0	0	0	0	0	0
Butyricimonas	0.00575126	0.00682962	0.00557153	0.00557153	0.00952552	0.00718907	0.00125809	0.0357656	0.00197699	0	0	0	0	0	0	0	0.000359454	0	0	0.000179727	0.00305536	0.00197699	0.00359454	0.00233645	0.00377426	0.00431344	0.00772825	0.00215672	0.00287563	0.00323508	0.0147376	0.00107836	0.00107836	0.00161754	0	0.00611071	0.00682962	0.0116822	0.000898634	0.000718907	0.000898634	0.00179727	0.00143781	0.00053918	0.000718907	0.00215672	0.000718907	0.000718907	0.00053918
Butyrivibrio	0.000179727	0.000179727	0.000179727	0	0	0.000179727	0.000179727	0	0	0	0	0	0	0	0	0	0	0	0	0	0	0	0	0.00179727	0	0.00395399	0	0	0.00179727	0.000179727	0	0	0	0	0	0	0.000179727	0	0	0	0	0.000359454	0	0	0.00053918	0	0	0	0
Candidatus_Arthromitus	0	0	0	0	0	0	0	0	0	0.00233645	0	0	0	0	0	0	0	0	0	0	0	0	0	0	0	0	0	0	0	0	0	0	0	0	0	0	0	0	0	0	0	0	0	0	0	0	0	0	0
Candidatus_Hepatincola	0	0	0	0	0	0.00107836	0	0	0	0	0	0	0	0	0	0	0	0	0	0	0	0	0	0	0	0	0	0	0	0	0	0	0	0	0	0	0.000359454	0	0	0	0	0	0	0	0	0	0	0	0
Candidatus_Saccharimonas	0	0.000898634	0.000359454	0	0.00233645	0.00143781	0	0	0	0.000359454	0.00233645	0.00053918	0.000359454	0.00161754	0.00413372	0	0.00251618	0.000359454	0.000718907	0	0.000359454	0.00521208	0.000718907	0.00557153	0.00143781	0.0026959	0.000898634	0.000179727	0.00251618	0.00197699	0.00287563	0	0	0.000718907	0	0	0.0026959	0.00197699	0	0.000359454	0.00125809	0.00161754	0.00179727	0.00233645	0.00233645	0.00179727	0.00359454	0.00395399	0.00395399
Candidatus_Soleaferrea	0	0	0	0	0	0	0	0	0.000179727	0	0	0	0	0	0	0	0	0	0	0	0	0	0	0	0	0	0	0	0	0	0	0	0	0	0	0	0	0	0	0	0.000179727	0	0	0	0	0	0	0	0
Candidatus_Stoquefichus	0	0	0	0	0	0	0	0.00323508	0.00557153	0.000718907	0.000718907	0.000179727	0	0	0	0.000179727	0	0	0	0	0.00844716	0	0.000179727	0	0	0	0.000359454	0.00161754	0	0	0.000179727	0	0	0	0	0	0	0.000179727	0	0.000179727	0	0	0	0	0	0	0	0	0
Cellulosilyticum	0	0	0	0	0	0	0	0.00251618	0.00053918	0	0	0	0	0	0	0	0	0	0	0	0	0	0	0	0	0	0	0	0	0	0	0	0	0.00521208	0	0	0	0	0	0	0	0	0	0	0	0	0	0	0
Christensenellaceae_R-7_group	0.000359454	0.0630841	0.00772825	0.0264198	0.00557153	0.00233645	0.00359454	0.000718907	0	0	0	0	0	0.000718907	0	0	0.00053918	0	0	0	0.000359454	0.000718907	0.000359454	0.000179727	0.00125809	0	0.000359454	0.00125809	0.00053918	0.000359454	0.00790798	0.00593098	0	0.00053918	0.000359454	0.00125809	0.00323508	0.034867	0	0	0.0267793	0.000898634	0.000179727	0.0192308	0.00233645	0.000718907	0.000359454	0	0
Citrobacter	0	0	0	0	0	0	0	0	0	0	0	0	0	0	0	0.000179727	0	0	0	0	0	0	0	0	0	0	0	0	0	0	0	0	0	0	0	0	0	0	0	0	0	0	0	0	0	0	0	0	0
Clostridium_sensu_stricto_1	0.000179727	0	0	0	0	0	0.000179727	0	0.00053918	0.000359454	0	0	0	0	0	0	0	0	0	0	0.00125809	0	0.000718907	0	0	0	0	0	0	0	0	0.000718907	0.000359454	0	0.000718907	0.000718907	0	0	0.000179727	0.000179727	0	0	0	0	0	0	0	0	0
Clostridium_sensu_stricto_13	0	0	0	0	0	0	0	0	0.000179727	0.00161754	0	0	0	0	0	0	0	0	0	0	0	0	0.00143781	0	0	0	0	0	0	0	0	0	0	0	0	0	0	0	0	0	0	0	0	0	0	0	0	0	0
Coprobacillus	0.00107836	0	0.000718907	0.000179727	0	0	0.00107836	0	0.000179727	0.00107836	0	0	0	0	0.000179727	0	0	0	0	0	0	0	0	0	0	0	0	0	0	0	0	0	0	0	0.000179727	0	0	0.00053918	0	0	0	0	0	0	0	0	0	0	0
Coriobacteriaceae_UCG-002	0	0	0	0	0	0	0.000179727	0	0	0	0	0	0	0	0	0	0	0	0	0	0	0	0	0	0	0	0	0	0	0	0	0	0	0	0	0	0	0	0	0	0	0	0	0	0	0	0	0	0
Corynebacterium_1	0.000179727	0.000359454	0.000179727	0.000718907	0.00053918	0	0.000179727	0	0.000718907	0.000359454	0	0.000179727	0.00251618	0	0.00053918	0.000179727	0	0	0.000179727	0	0	0	0	0	0	0	0	0	0	0	0	0	0	0	0.000179727	0	0	0.00197699	0.000179727	0	0	0	0	0	0	0.00215672	0.000179727	0.000179727	0.00143781
Defluviitaleaceae_UCG-011	0	0	0	0	0	0.000179727	0	0	0	0	0	0	0	0	0	0	0	0	0	0	0	0	0.000179727	0	0	0	0.000179727	0	0.000179727	0.000179727	0	0	0	0	0	0	0	0	0	0	0	0	0	0	0	0	0	0.000179727	0
Delftia	0	0	0	0	0	0	0	0	0	0	0	0	0	0	0.000179727	0	0	0	0	0	0	0	0	0	0	0	0	0	0	0	0	0	0	0	0	0	0	0	0	0	0	0	0	0	0	0	0	0	0
Desulfovibrio	0.0143781	0.00629044	0.0186916	0.00647017	0.0134795	0.0343278	0.0167146	0.00197699	0.00287563	0.0738677	0.00197699	0.00053918	0	0.00053918	0	0	0.000179727	0.000179727	0	0.000359454	0.00251618	0.0129403	0.00359454	0.00772825	0.00629044	0.00395399	0.00557153	0.00377426	0.00952552	0.00449317	0.0124012	0.0195902	0.00772825	0.00898634	0.00934579	0.0147376	0.0172538	0.0183321	0.0167146	0.0239037	0.00862689	0.00934579	0.0244428	0.00988497	0.0145579	0.00916607	0.0124012	0.0127606	0.0168943
Dielma	0	0	0	0	0	0	0	0.00431344	0	0	0	0	0	0	0	0	0	0	0	0	0	0	0	0	0	0	0	0	0	0	0	0	0	0	0	0	0	0	0	0	0	0	0	0	0	0	0	0	0
Elusimicrobium	0	0	0	0.000179727	0	0	0	0	0	0	0	0	0	0	0	0	0	0	0	0	0	0	0	0	0	0	0	0	0	0	0	0	0	0.000359454	0	0.000179727	0	0	0	0	0	0	0	0.000179727	0	0	0	0	0
Enterobacter	0	0	0	0	0	0	0.000179727	0	0	0	0.000179727	0	0	0.000898634	0.000898634	0.00125809	0	0.00233645	0.00179727	0.00179727	0	0	0	0	0	0	0.000179727	0	0	0	0	0	0	0	0	0	0	0	0	0	0	0	0	0	0	0	0	0	0
Enterococcus	0	0	0.000179727	0	0	0	0.000179727	0.000179727	0	0.000179727	0.0868081	0.0451114	0.149533	0.113947	0.0514019	0.0934579	0.0576923	0.0950755	0.083573	0.130661	0.00413372	0	0.000179727	0	0	0	0	0	0	0	0	0	0	0	0.000359454	0	0	0	0.00053918	0	0	0	0	0	0	0	0	0	0
Epulopiscium	0	0	0	0	0	0.000179727	0	0.000718907	0.0424155	0.0156362	0	0	0	0	0	0.000359454	0	0	0	0.000179727	0.00718907	0	0	0	0	0	0	0	0	0	0	0.000179727	0	0.000179727	0	0.000179727	0	0	0.000179727	0	0	0	0	0	0	0	0	0	0
Erysipelatoclostridium	0.00161754	0.000179727	0.0026959	0.000359454	0	0.00215672	0.000179727	0.000359454	0.000898634	0.00647017	0.000179727	0	0	0	0	0	0	0	0	0	0.00431344	0	0.000179727	0	0	0.000359454	0	0.00053918	0	0	0	0.000359454	0	0	0.000179727	0.000718907	0	0.000179727	0.00233645	0.00395399	0	0.000359454	0	0	0.000359454	0	0	0	0
Erysipelotrichaceae_UCG-003	0.00125809	0	0.000179727	0	0	0	0.000179727	0	0	0.000179727	0	0	0	0	0	0	0	0	0	0	0	0	0	0	0	0	0	0	0	0	0	0	0	0	0	0	0	0	0.000179727	0	0	0	0	0	0	0	0	0	0
Erysipelotrichaceae_UCG-004	0	0.000359454	0	0.0026959	0	0	0	0	0.0026959	0	0	0	0	0	0	0	0	0	0	0	0	0.00053918	0	0	0	0	0	0	0.000898634	0	0.00125809	0.000179727	0	0.00161754	0	0	0	0.00629044	0	0	0.00053918	0	0	0.00161754	0.000718907	0.000179727	0.000718907	0	0.000179727
Escherichia-Shigella	0.05266	0.00125809	0.0294752	0.00143781	0.000359454	0.0226456	0.0629044	0.134256	0.0612868	0.0172538	0.344716	0.396477	0.403127	0.35496	0.715492	0.480769	0.312006	0.34867	0.290079	0.459561	0.206686	0.00305536	0.14468	0.00305536	0.00251618	0.0143781	0.113587	0.000718907	0.00557153	0.00233645	0.000179727	0.0073688	0.000179727	0.0156362	0.024982	0.013839	0	0.00053918	0.00718907	0.00053918	0.00143781	0.000718907	0.000359454	0	0.000359454	0.00125809	0.00107836	0.00377426	0.00251618
Facklamia	0	0	0.000179727	0	0	0	0.000359454	0	0	0	0.00197699	0.00233645	0.00053918	0.00197699	0.00143781	0.000718907	0	0.00053918	0.00053918	0	0	0	0	0	0	0.000179727	0	0	0	0	0	0	0	0	0	0	0	0.000359454	0	0	0	0	0	0	0	0.000179727	0	0.000179727	0.000359454
Faecalitalea	0.000179727	0	0.000898634	0	0	0	0	0.000179727	0.000179727	0	0	0	0	0	0	0	0	0	0	0	0	0	0	0	0	0	0.0053918	0.000179727	0	0	0	0	0	0	0	0	0	0	0	0	0	0	0	0	0	0	0	0	0
Family_XIII_AD3011_group	0	0	0	0	0	0	0	0.000179727	0	0	0	0	0	0	0	0	0	0	0	0	0	0	0	0.000359454	0.000179727	0	0	0	0	0	0	0	0	0	0	0	0	0	0	0	0.00053918	0	0	0.000179727	0	0.000179727	0.000359454	0.000359454	0.000179727
Family_XIII_UCG-001	0	0	0	0	0	0.000179727	0.000179727	0	0	0	0	0	0	0	0	0	0	0	0	0	0	0	0	0.000179727	0	0.000179727	0.000179727	0	0.00053918	0.000359454	0	0	0.000179727	0	0	0	0	0	0	0	0.000179727	0.000359454	0.000359454	0	0.00053918	0	0.000179727	0	0.000179727
Globicatella	0	0	0	0	0	0	0	0	0	0	0.000179727	0.00503235	0.000898634	0	0.00125809	0.00251618	0	0	0	0.0165349	0	0	0	0	0	0	0	0	0	0	0	0	0	0	0	0	0	0	0	0	0	0	0	0	0	0	0	0	0
Helicobacter	0.305176	0.0310927	0.0930985	0.0246226	0.0673976	0.0265996	0.0219267	0.0549964	0.297268	0.126348	0.0799784	0.00395399	0.000359454	0.00053918	0	0.00125809	0.00053918	0	0.000179727	0.000179727	0.0341481	0.0212078	0.0537383	0.040798	0.0201294	0.131201	0.0771028	0.0300144	0.0968728	0.0415169	0.0125809	0.159597	0.0370237	0.0406183	0.0233645	0.0111431	0.13156	0.023005	0.0436736	0.110891	0.0860891	0.026959	0.0116822	0.00952552	0.00916607	0.00575126	0.0147376	0.00413372	0.00952552
Holdemania	0.00197699	0	0.00161754	0	0	0	0.00107836	0.00125809	0	0.0053918	0	0	0	0	0	0	0	0	0	0	0	0	0	0	0	0	0	0.000179727	0.000179727	0	0	0	0	0	0.00179727	0	0	0	0.000898634	0.000898634	0	0	0	0	0	0	0	0	0
Hydrogenoanaerobacterium	0	0	0	0	0	0	0	0	0	0	0	0	0	0	0	0	0	0	0	0	0	0	0	0	0	0	0	0	0.000179727	0	0	0	0	0	0	0	0	0	0	0	0	0	0	0	0	0	0	0	0
Ignavigranum	0	0	0	0	0	0	0	0	0	0	0.000359454	0.00053918	0	0.000179727	0.000898634	0	0	0	0.000179727	0	0	0	0	0	0	0	0	0	0	0	0	0	0	0	0	0	0	0	0	0	0	0	0	0	0	0	0	0	0
Incertae_Sedis	0	0	0	0	0	0	0	0	0	0	0	0	0	0	0	0	0	0	0	0	0.000359454	0	0	0	0	0	0	0	0	0	0	0	0	0	0.00125809	0	0	0	0	0	0	0	0	0	0	0	0	0	0
Jeotgalicoccus	0	0	0	0.000179727	0	0	0.000359454	0	0	0	0	0	0.000359454	0	0.00107836	0	0	0	0	0	0	0	0	0	0	0	0	0	0	0	0	0	0	0	0	0	0	0.000359454	0	0	0	0	0	0	0	0.00143781	0.000359454	0.000179727	0.000179727
Klebsiella	0.000179727	0	0.00053918	0	0	0	0.00161754	0	0	0	0.000179727	0	0.00053918	0.000179727	0.000359454	0	0	0.000179727	0.000359454	0.000179727	0	0	0	0	0	0	0	0	0	0	0	0	0	0	0	0	0	0.000179727	0	0	0	0	0	0	0	0	0	0	0
Lachnospira	0	0	0	0	0	0	0	0	0	0	0	0	0	0	0	0	0	0	0	0	0.000179727	0	0	0	0	0	0	0	0	0	0	0	0.00053918	0	0	0	0	0	0	0	0	0	0	0	0	0	0	0	0
Lachnospiraceae_NK4A136_group	0.00305536	0.000718907	0.000359454	0.000898634	0.00233645	0.00107836	0.00197699	0.000359454	0	0.000179727	0.000179727	0	0	0	0	0	0	0	0	0	0.00143781	0.019051	0.000898634	0.00341481	0.0104242	0.00341481	0.0073688	0.0026959	0.00862689	0.0120417	0.00341481	0.00251618	0.00215672	0.00844716	0	0.00359454	0.00107836	0.000898634	0.0176132	0.0208483	0.0274982	0.0106039	0.0174335	0.019051	0.0156362	0.0201294	0.0199497	0.0337886	0.055895
Lachnospiraceae_NK4B4_group	0.000179727	0	0	0	0.000359454	0.000359454	0	0	0	0	0	0	0	0	0	0	0	0	0	0	0	0.000359454	0	0.000359454	0.000179727	0	0	0.000179727	0	0.000179727	0	0	0	0	0	0	0.000179727	0.000359454	0	0	0.000718907	0.000359454	0	0.00233645	0.00341481	0	0.000359454	0.000179727	0.000179727
Lachnospiraceae_UCG-001	0	0	0	0	0	0	0	0	0	0	0	0	0	0	0	0	0	0	0	0	0	0	0	0	0	0	0	0	0	0	0	0.00107836	0	0	0	0	0	0	0	0	0	0	0	0	0	0	0	0	0
Lachnospiraceae_UCG-004	0	0	0.000179727	0	0	0.000179727	0	0	0.000179727	0	0	0	0	0	0	0	0	0	0	0	0	0	0	0	0	0	0	0	0	0	0	0	0	0	0	0	0	0	0	0	0	0	0	0	0	0	0	0	0
Lachnospiraceae_UCG-010	0	0	0.0026959	0	0	0	0	0.00161754	0	0	0	0.000179727	0	0.000179727	0	0	0	0	0	0	0	0	0	0	0	0.000179727	0.000898634	0.00664989	0	0	0.000179727	0.000179727	0	0	0	0.0046729	0	0	0.00143781	0.00125809	0.000179727	0.00053918	0	0	0	0	0	0	0
Lacticigenium	0	0	0	0	0	0	0	0	0	0	0	0	0	0	0	0	0	0	0	0	0	0	0	0	0	0	0	0	0	0	0	0	0	0	0	0	0	0	0	0	0	0	0	0	0	0	0	0	0
Lactobacillus	0.000718907	0.000359454	0.000179727	0.000718907	0	0.00341481	0.00107836	0.000898634	0.000179727	0.000898634	0.000359454	0	0.00053918	0.00143781	0.00125809	0.000359454	0.00053918	0.000179727	0	0.000898634	0.000179727	0	0.00233645	0.0179727	0.00359454	0.000179727	0.00197699	0.00197699	0.00215672	0.00772825	0.0026959	0.00682962	0.00431344	0.000718907	0.0026959	0.000359454	0.0106039	0	0.00053918	0.00053918	0.00485262	0.0140187	0.00377426	0.0149173	0.0120417	0.00682962	0.000898634	0.00593098	0.000718907
Lactococcus	0	0	0	0	0	0	0	0	0	0.000179727	0.000179727	0	0	0	0	0	0	0.000179727	0	0	0	0	0	0	0	0	0	0	0	0	0	0	0	0	0	0	0	0.000179727	0	0	0	0	0	0	0	0	0	0	0
Lolium_perenne	0	0	0	0	0	0	0	0	0	0	0	0	0	0	0	0	0	0	0	0	0	0	0	0	0	0	0	0	0	0	0	0	0	0	0	0	0	0	0	0	0	0	0	0	0	0.000179727	0	0	0
Lysinibacillus	0	0	0	0	0	0	0	0.00287563	0	0	0.0540978	0.069734	0.00629044	0.102983	0.00053918	0.171819	0.193925	0.0848311	0.00898634	0.0573329	0	0	0	0	0	0	0	0	0.000179727	0	0	0	0	0	0	0	0	0	0	0	0	0	0	0	0	0	0	0	0
Marvinbryantia	0	0	0	0	0	0.000179727	0	0	0	0	0	0	0	0	0	0	0	0	0	0	0	0	0	0	0	0	0	0	0	0	0	0	0	0	0	0	0	0	0	0	0.000179727	0	0	0	0	0	0	0	0
Moraxella	0	0	0	0	0	0	0	0	0	0	0	0	0	0	0	0	0	0	0	0	0	0	0	0	0	0	0	0	0	0	0.00053918	0	0	0	0	0	0	0	0	0	0	0	0	0	0	0	0	0	0
Morganella	0.000179727	0	0.000898634	0	0	0	0.00161754	0.00215672	0	0.000179727	0.0614666	0.0886053	0.0621855	0.0436736	0.0564342	0.00413372	0.111071	0.0523005	0.208843	0.0530194	0.00575126	0	0.000898634	0	0	0.00107836	0.00125809	0	0.000179727	0	0	0	0	0	0	0	0	0.000179727	0	0	0	0	0	0	0	0	0	0	0
Mucispirillum	0.000179727	0.0411574	0.108196	0.00107836	0.00754853	0.00700935	0.00179727	0	0.0046729	0.000179727	0.00107836	0.000179727	0	0	0	0	0	0	0.000179727	0	0.00772825	0.00287563	0.00898634	0.00395399	0.00179727	0.0310927	0.034867	0.00305536	0.0131201	0.00700935	0.0053918	0.00970525	0.0115025	0.00970525	0.000179727	0.026959	0.0172538	0.0307333	0.000179727	0.000359454	0.0053918	0.0053918	0.00431344	0.000718907	0.00107836	0.00053918	0.00053918	0.000898634	0.000359454
Mycoplasma	0	0	0	0	0	0	0	0	0	0	0.00287563	0	0.00179727	0.000359454	0.000718907	0.00916607	0.00287563	0.000718907	0	0.0026959	0.000179727	0	0	0.000179727	0.000179727	0.000359454	0	0	0	0	0	0.00215672	0	0.000359454	0	0	0	0	0	0	0	0	0.000359454	0.000179727	0	0	0.000179727	0	0.000179727
Myroides	0	0	0	0	0	0	0	0	0	0	0	0	0	0	0	0	0	0.000359454	0	0	0	0	0	0	0	0	0	0	0	0	0	0	0	0	0	0	0	0	0	0	0	0	0	0	0	0	0	0	0
Nosocomiicoccus	0	0	0	0	0	0	0.000179727	0	0	0	0	0	0	0	0	0	0	0	0	0	0	0	0	0	0	0	0	0	0	0	0	0	0	0	0	0	0	0	0	0	0	0	0	0	0	0	0	0	0
Odoribacter	0	0.000718907	0	0.000359454	0.00125809	0.00161754	0.000179727	0.000179727	0.000898634	0	0.000359454	0	0	0.000359454	0	0	0	0	0	0.000359454	0.00125809	0.000718907	0.000359454	0.000359454	0.000359454	0.00215672	0.00611071	0.000179727	0.00179727	0.000718907	0.00125809	0	0	0.000179727	0.000898634	0.00053918	0.000718907	0.000359454	0.00125809	0.000179727	0.000718907	0.00053918	0.00970525	0.00053918	0.000359454	0.00053918	0.00161754	0.00053918	0.00287563
Oscillibacter	0.00323508	0.00952552	0.00557153	0.024982	0.017074	0.0222861	0.00611071	0.0026959	0.00161754	0.00215672	0.000359454	0.00053918	0.000179727	0.000359454	0.000179727	0.000359454	0	0	0	0.000359454	0.00970525	0.0390007	0.0149173	0.0206686	0.0264198	0.0134795	0.0053918	0.00305536	0.0278577	0.0208483	0.0282171	0.0115025	0.0264198	0.00916607	0.00593098	0.0242631	0.017074	0.0174335	0.0271387	0.0265996	0.0291157	0.0206686	0.0343278	0.0231848	0.017793	0.028936	0.0300144	0.0366643	0.0400791
Oscillospira	0	0	0	0	0	0	0	0.00053918	0	0	0	0	0	0	0	0	0	0	0	0	0	0	0	0	0	0	0	0.000179727	0	0	0	0	0	0	0	0	0	0	0	0	0	0	0	0	0	0	0	0	0
Paenalcaligenes	0	0	0.000179727	0	0	0.000179727	0.000179727	0	0	0	0	0	0	0	0	0	0	0	0	0	0	0	0	0	0	0	0	0	0	0	0	0	0	0	0	0	0	0	0	0	0	0	0	0	0	0	0	0	0
Paenibacillus	0	0	0	0	0	0	0	0	0	0	0.000179727	0.00359454	0.00233645	0	0.0125809	0	0.00790798	0.0318116	0.024982	0.0026959	0	0	0	0	0	0	0	0	0	0	0	0	0	0	0	0	0	0	0	0	0	0	0	0	0	0	0	0	0
Papillibacter	0	0	0	0	0	0	0	0	0	0	0	0	0	0	0	0	0	0	0	0	0	0.000179727	0	0.000179727	0	0	0	0	0	0	0.000179727	0	0	0	0	0	0	0	0	0	0.000179727	0.000179727	0.000179727	0.000179727	0.000179727	0.000359454	0	0.000179727	0.00053918
Parabacteroides	0.0194105	0.00521208	0.0100647	0.00521208	0.00593098	0.0185119	0.00970525	0.0203091	0.00449317	0.0131201	0.00107836	0.000898634	0	0	0.000179727	0.000179727	0.00053918	0	0	0	0.00647017	0.000718907	0.00161754	0.000359454	0.00125809	0.00125809	0.00575126	0.00575126	0.00107836	0.00161754	0.00287563	0.0248023	0.0515816	0.0192308	0.0932782	0.00503235	0.0026959	0.00629044	0.00593098	0.00611071	0.000898634	0.00808771	0.000179727	0.00215672	0.00143781	0	0	0	0.000179727
Parasutterella	0.0127606	0.00844716	0.0208483	0.00485262	0.00431344	0.00772825	0.0702732	0.019051	0.0301941	0.00700935	0.00251618	0.00251618	0	0.00341481	0.00521208	0.000179727	0.0251618	0.0100647	0.0648814	0.00413372	0.00916607	0.00215672	0.0215672	0.00053918	0.00125809	0.00107836	0.000718907	0.00179727	0.00323508	0.00215672	0.00107836	0.0168943	0.00233645	0.00916607	0.00053918	0.0253415	0.00179727	0.00395399	0.00233645	0.000179727	0.00053918	0.00143781	0.00377426	0.00107836	0.00143781	0.00161754	0.00053918	0.00718907	0
Peptococcus	0.000179727	0.000179727	0.000179727	0.000179727	0.00053918	0.00143781	0.00233645	0	0	0	0	0	0	0	0	0	0	0	0	0	0.000359454	0.000898634	0.000359454	0.000718907	0	0.000718907	0	0.000359454	0.00053918	0	0.00143781	0	0.00197699	0	0	0.000359454	0.000359454	0.000898634	0.00251618	0	0.000898634	0.00197699	0.00125809	0.00251618	0.00143781	0.00107836	0.00125809	0.000718907	0.00413372
Peptostreptococcus	0	0	0	0	0	0	0	0	0	0	0	0	0	0	0	0	0	0	0	0	0	0	0.000718907	0	0	0.000718907	0	0	0	0	0	0	0	0	0	0	0	0	0	0	0	0	0	0	0	0	0	0	0
Phascolarctobacterium	0.00125809	0	0.000718907	0	0	0	0.00125809	0.00107836	0.000359454	0.00179727	0.00053918	0.00053918	0	0.000179727	0	0.000179727	0.000359454	0	0	0	0	0.000179727	0	0	0	0	0	0.00718907	0.000179727	0	0	0	0.000359454	0	0.0159957	0	0	0	0.0226456	0.0208483	0	0	0	0	0	0	0	0	0
Phaseolus_acutifolius_(tepary_bean)	0	0	0	0	0	0	0	0	0	0	0	0	0.000179727	0	0	0	0	0	0	0.000179727	0	0	0	0	0	0	0	0	0	0	0	0.000359454	0	0	0	0	0	0	0	0	0	0	0	0	0	0	0	0	0
Prevotella_9	0.0026959	0.000359454	0.00341481	0.000898634	0	0	0.000359454	0.00772825	0.0363048	0.00557153	0.00916607	0.00521208	0	0.000179727	0.000359454	0.000359454	0.0282171	0	0	0.000179727	0.000718907	0.0115025	0.00862689	0.00629044	0.0354062	0.00053918	0.0255212	0.433861	0.00772825	0.0343278	0.00125809	0.000718907	0.131201	0	0.000179727	0.000718907	0.00107836	0	0.0460101	0.00179727	0.000359454	0.100647	0.00700935	0.00772825	0.179367	0.0265996	0.00575126	0.0073688	0.00377426
Prevotellaceae_NK3B31_group	0.000179727	0.000718907	0.00143781	0.000179727	0.00377426	0.00341481	0.000718907	0	0.000179727	0	0.000179727	0	0	0.000359454	0	0	0	0	0	0	0.000359454	0.00233645	0.00161754	0.00143781	0.00053918	0.00251618	0.000359454	0.00053918	0.000898634	0.00053918	0.00053918	0	0.000179727	0.00718907	0	0.000898634	0.00503235	0.000898634	0.00215672	0.000179727	0.00107836	0.000898634	0.000359454	0.00449317	0.00125809	0.0102444	0.000359454	0.000718907	0
Prevotellaceae_UCG-001	0	0	0	0	0	0	0	0	0	0	0	0	0	0	0	0	0	0	0	0	0	0	0	0	0	0	0	0	0	0	0	0	0	0	0.00053918	0	0	0	0	0	0	0	0	0	0	0	0	0	0
Propionibacterium	0	0	0	0	0	0	0	0	0	0	0	0	0	0	0	0	0	0	0	0	0	0	0	0	0	0	0	0	0	0	0	0	0	0	0	0	0	0	0	0.000179727	0	0	0	0	0	0	0	0	0
Proteus	0	0	0	0	0	0	0	0	0	0.00053918	0.129044	0.0384615	0.0244428	0.0979511	0.00629044	0.0165349	0.0551761	0.0747664	0.0355859	0.0143781	0.000898634	0	0.0102444	0.000179727	0.000179727	0.000718907	0.00611071	0	0	0	0	0	0	0	0	0	0	0	0.00107836	0	0	0	0	0	0	0	0	0	0
Pseudoflavonifractor	0.00251618	0.00107836	0.000718907	0.000179727	0.000179727	0.000179727	0.00197699	0.00449317	0.000179727	0.00053918	0	0	0	0	0	0	0	0	0	0	0	0.000179727	0	0.000179727	0.000179727	0.000898634	0.000359454	0.000179727	0.000179727	0	0.00143781	0.000359454	0	0	0.00053918	0.00053918	0.000359454	0.000898634	0.000179727	0.000359454	0.000179727	0.000179727	0.00053918	0.00053918	0	0.000179727	0	0	0.000359454
Pseudomonas	0	0	0	0	0	0	0	0	0	0	0.000179727	0.00107836	0.000179727	0	0	0.00359454	0	0	0	0.0053918	0	0	0	0	0	0	0	0	0	0	0	0	0	0	0	0	0	0.00053918	0	0	0	0	0	0	0	0	0	0	0
Psychrobacter	0	0	0.000359454	0	0	0.000179727	0.00125809	0	0	0	0	0	0	0	0	0	0	0.000179727	0	0	0	0	0	0	0	0	0	0	0	0	0	0	0	0	0	0	0	0	0	0	0	0	0	0	0	0	0	0	0
Ralstonia	0	0	0	0	0	0	0	0	0.000179727	0	0	0	0	0	0	0	0	0	0	0	0	0	0	0	0	0	0	0	0	0	0	0	0	0	0	0	0	0	0	0	0	0	0	0	0	0	0	0	0
Rikenella	0	0	0	0	0	0	0	0	0	0	0	0	0	0	0	0	0	0	0	0	0	0	0.000359454	0	0	0.000179727	0	0	0	0	0	0.000898634	0	0	0	0	0	0	0	0	0	0	0	0	0	0	0	0	0
Rikenellaceae_RC9_gut_group	0.0106039	0.0398994	0.0201294	0.0204889	0.0179727	0.0298347	0.0131201	0.0046729	0.00844716	0.00107836	0.00197699	0.000359454	0	0.00251618	0	0	0.0141984	0	0	0.00107836	0.0192308	0.0136592	0.0145579	0.0116822	0.0120417	0.0188713	0.00664989	0.00629044	0.017074	0.0113228	0.0188713	0.00197699	0.000718907	0.00305536	0.00305536	0.0321711	0.0325306	0.0375629	0.00916607	0.00341481	0.00970525	0.0111431	0.00593098	0.00647017	0.00485262	0.00682962	0.00233645	0.00287563	0.00503235
Ruminiclostridium	0.000359454	0	0.00107836	0.000359454	0	0.00179727	0.00233645	0	0	0	0	0	0	0	0	0	0	0	0	0	0	0.00053918	0	0.00053918	0.000359454	0	0	0	0	0.000359454	0.000179727	0	0	0.000179727	0	0	0	0.000179727	0	0	0.000359454	0	0.00053918	0	0.00053918	0.00215672	0.00053918	0.00125809	0.000179727
Ruminiclostridium_5	0	0.00143781	0.000359454	0.000718907	0.00125809	0.00233645	0.00125809	0.00215672	0.000359454	0.00143781	0.00053918	0	0	0.00053918	0.000179727	0	0	0	0	0	0.000359454	0.0159957	0.00287563	0.00395399	0.00557153	0.00179727	0.00179727	0.00251618	0.00754853	0.00323508	0.00197699	0.00107836	0.00179727	0.000718907	0.00053918	0.00053918	0.000898634	0.00215672	0.00215672	0.00287563	0.0026959	0.00485262	0.00287563	0.00395399	0.00395399	0.00718907	0.00682962	0.00611071	0.00916607
Ruminiclostridium_6	0.000359454	0.000359454	0.000179727	0	0.000359454	0.00143781	0.00107836	0	0.000359454	0	0.000898634	0.00053918	0.000179727	0	0	0	0.000179727	0	0	0.000359454	0.000359454	0.00125809	0.00053918	0.00143781	0.00107836	0.00125809	0.00053918	0.00305536	0.00107836	0.00143781	0.00125809	0	0.000359454	0.00161754	0	0	0.00179727	0.00107836	0.00395399	0	0.000359454	0.0026959	0.0026959	0.00862689	0.00161754	0.00772825	0.00485262	0.000898634	0.00107836
Ruminiclostridium_9	0.00772825	0.0150971	0.00718907	0.0195902	0.0124012	0.0163551	0.0141984	0.00251618	0.00503235	0.00844716	0.000359454	0.00053918	0	0.00233645	0.000179727	0.000179727	0.00647017	0.000179727	0	0	0.0102444	0.0514019	0.0109633	0.0332495	0.0199497	0.0115025	0.00305536	0.00359454	0.0305536	0.0197699	0.0352265	0.00287563	0.00664989	0.00575126	0.0100647	0.0161754	0.0152768	0.0172538	0.0185119	0.0186916	0.0132998	0.0195902	0.0131201	0.0221064	0.023005	0.0152768	0.021028	0.0452912	0.0154565
Ruminococcaceae_NK4A214_group	0.00251618	0.00503235	0.00359454	0.00629044	0.00413372	0.00503235	0.00772825	0.00575126	0.00215672	0	0	0.000179727	0	0.000179727	0	0	0.000359454	0	0	0	0.00161754	0.00413372	0.00233645	0.00413372	0.00305536	0.00179727	0.00107836	0.0046729	0.00287563	0.00287563	0.00826743	0.000179727	0.00053918	0.00323508	0	0.00143781	0.00647017	0.00664989	0.000359454	0.000898634	0.0073688	0.00251618	0.00053918	0.0046729	0.00413372	0.00952552	0.00053918	0.00107836	0.00053918
Ruminococcaceae_UCG-004	0	0	0	0	0	0.000359454	0	0.000179727	0	0	0	0	0	0	0	0	0	0	0	0	0	0	0	0.000179727	0	0	0	0.000179727	0.000179727	0	0	0	0	0	0	0.000359454	0.000359454	0	0	0	0	0	0	0	0	0	0.000179727	0	0.000179727
Ruminococcaceae_UCG-005	0.000179727	0.00341481	0.0026959	0.00179727	0.00107836	0.00305536	0.000898634	0.000359454	0.00053918	0	0.000179727	0.000179727	0.000179727	0.000898634	0	0.000179727	0.00898634	0	0	0.000179727	0.000179727	0.00233645	0.000898634	0.00161754	0.00647017	0.00125809	0.00125809	0.00754853	0.000898634	0.00647017	0.00988497	0.000179727	0	0.00053918	0.000179727	0.000359454	0.00161754	0.00395399	0	0.00053918	0.0100647	0.00287563	0.00197699	0.0102444	0.0053918	0.0053918	0.00161754	0.00215672	0.00233645
Ruminococcaceae_UCG-008	0.00053918	0	0	0.000179727	0	0	0	0	0	0	0	0	0	0	0	0	0	0	0	0	0	0	0	0	0	0	0	0	0	0	0	0	0	0	0	0	0	0	0.000359454	0	0	0	0.000179727	0	0	0	0	0	0
Ruminococcaceae_UCG-009	0.000179727	0.000179727	0.000179727	0.000359454	0.000359454	0.000179727	0.000718907	0	0	0	0	0	0	0	0	0	0	0	0	0	0	0.00053918	0.00053918	0.000179727	0.000898634	0.000359454	0.000359454	0	0.000898634	0.000359454	0.000898634	0	0.00053918	0.000179727	0	0.000359454	0	0.000718907	0.00053918	0.00503235	0.00125809	0.00107836	0.000718907	0.00053918	0.000718907	0.00125809	0.00215672	0.00179727	0.00161754
Ruminococcaceae_UCG-010	0.000359454	0.00143781	0.000898634	0	0.00323508	0.00251618	0	0.00161754	0.00053918	0	0.000179727	0	0	0	0.000179727	0	0	0	0	0	0.00143781	0.00287563	0.00215672	0.00251618	0.00700935	0.00233645	0.000359454	0.00143781	0.0046729	0.00629044	0.00287563	0.00125809	0	0.00161754	0	0.000179727	0.0026959	0.00377426	0	0	0.00790798	0.00844716	0.00754853	0.0132998	0.00880661	0.00395399	0.00682962	0.00808771	0.00485262
Ruminococcaceae_UCG-013	0.000179727	0.000179727	0.000359454	0	0.00179727	0.000898634	0.000359454	0	0.00053918	0	0.000179727	0	0	0	0	0	0.000179727	0	0.000179727	0.000179727	0.000359454	0.00395399	0.000898634	0.00323508	0.00215672	0.00125809	0.000359454	0	0.00287563	0.00341481	0.000359454	0.000359454	0.00053918	0.00107836	0	0.000359454	0.00161754	0.000718907	0.00107836	0.00053918	0.00413372	0.000718907	0.00107836	0.00413372	0.00251618	0.0026959	0.00287563	0.00107836	0.00053918
Ruminococcaceae_UCG-014	0.000179727	0.0143781	0.00970525	0.00197699	0.00395399	0.00700935	0.00629044	0.00053918	0.00179727	0.000179727	0.00251618	0.000718907	0	0.00664989	0.000718907	0.000359454	0.0053918	0.000359454	0.00053918	0.000359454	0.00215672	0.013839	0.00485262	0.0124012	0.0104242	0.0156362	0.00125809	0.00179727	0.0134795	0.0120417	0.00611071	0.000359454	0.000179727	0.00431344	0	0.000898634	0.00359454	0.00233645	0.00125809	0.000179727	0.0100647	0.00880661	0.00844716	0.0168943	0.0132998	0.0113228	0.0116822	0.017074	0.0127606
Ruminococcaceae_V9D2013_group	0	0	0	0.000179727	0	0	0	0	0	0	0	0	0	0	0	0	0	0	0	0	0	0	0	0	0	0	0	0	0	0	0	0	0	0	0	0	0	0	0	0	0	0	0	0	0	0	0	0	0
Ruminococcus_1	0.00143781	0.00521208	0.000179727	0.00431344	0.00808771	0.00629044	0.00611071	0.00107836	0.00161754	0.000179727	0.000179727	0.000179727	0	0.00053918	0	0	0.00053918	0	0	0	0	0.00862689	0.00125809	0.00233645	0.00647017	0.000718907	0.000359454	0.015816	0.00629044	0.00790798	0.00844716	0.00305536	0	0.00862689	0	0.0073688	0.00377426	0.00790798	0.00125809	0	0.0122214	0.0127606	0.00772825	0.0125809	0.0100647	0.00880661	0.00988497	0.00233645	0.00485262
Ruminococcus_2	0	0.000179727	0.0073688	0	0	0.000718907	0.000359454	0.0125809	0	0.00143781	0	0	0	0	0	0	0	0	0	0.000179727	0	0.000179727	0.000718907	0	0	0	0.00305536	0.00143781	0.000179727	0	0.0122214	0	0	0.00449317	0.00161754	0	0	0	0	0	0.00251618	0	0	0.00125809	0	0.000359454	0.000179727	0.000179727	0
Sedimentibacter	0	0	0	0	0	0	0	0.00251618	0	0	0	0	0	0	0	0	0	0	0	0	0	0	0	0	0	0	0	0	0	0	0	0	0	0	0	0	0	0	0	0	0	0	0	0	0	0	0	0	0
Staphylococcus	0	0.000179727	0	0	0	0	0	0	0	0	0.000179727	0	0	0.000359454	0	0.000179727	0	0	0	0	0	0	0	0	0	0	0	0	0	0	0	0	0	0	0	0	0	0	0	0	0	0.000179727	0	0	0	0	0.000179727	0	0
Streptococcus	0	0	0.000359454	0	0	0	0.000179727	0	0	0	0.000898634	0	0.00377426	0.000179727	0.00125809	0.00053918	0	0.00521208	0.000898634	0.00053918	0	0	0.000179727	0	0	0.000179727	0.000718907	0	0	0	0	0	0	0	0	0	0	0.000359454	0	0	0	0.000359454	0.000179727	0.00053918	0.000179727	0	0	0.000179727	0
Subdoligranulum	0	0	0.000359454	0	0	0	0.000179727	0.00125809	0.00053918	0	0	0	0	0	0	0	0.00053918	0	0	0	0	0	0	0	0	0	0	0.00341481	0	0	0	0	0	0	0	0	0	0	0.000359454	0.000179727	0	0.000179727	0	0	0	0	0	0.000179727	0
Sutterella	0.00629044	0.000359454	0.0186916	0.000179727	0.000359454	0.00521208	0.0134795	0.0100647	0.00341481	0.00413372	0.00179727	0.000179727	0	0	0	0.000179727	0	0	0	0	0.0454709	0	0	0	0	0	0.000179727	0.00143781	0	0	0	0	0	0	0.00826743	0	0	0.000179727	0.00179727	0.00305536	0	0	0	0	0	0	0	0.000359454	0
Tepidibacter	0	0	0	0	0	0	0	0.00161754	0	0	0	0	0	0	0	0	0	0	0	0	0	0	0	0	0	0	0	0	0	0	0	0	0	0	0	0	0	0	0	0	0	0	0	0	0	0	0	0	0
Terrisporobacter	0	0	0	0	0	0	0	0	0.00053918	0	0.000179727	0	0	0	0	0	0	0	0	0	0	0	0.000179727	0	0	0	0	0	0	0	0	0	0	0.000179727	0.000179727	0.000179727	0	0	0	0	0	0	0	0	0	0	0	0	0
Thalassospira	0.00125809	0.00233645	0.00664989	0.00107836	0.00053918	0.000179727	0.00215672	0	0.00413372	0	0.00053918	0	0	0.00143781	0.000179727	0.000179727	0.00233645	0.000179727	0	0	0.0026959	0.00880661	0.00143781	0.00431344	0.00682962	0.0165349	0.00934579	0.0188713	0.0213875	0.0124012	0.00125809	0.000179727	0.000179727	0.0188713	0	0.00215672	0.00287563	0.0102444	0	0.000179727	0.011862	0.00557153	0.00287563	0.00682962	0.00377426	0.00647017	0.00323508	0.00359454	0.00287563
Trichococcus	0	0	0	0	0	0	0	0	0	0	0.000718907	0	0	0.000179727	0.000179727	0	0	0	0.00287563	0.000898634	0	0	0	0	0	0	0	0	0	0	0	0	0	0	0	0	0	0	0	0	0	0	0	0	0	0	0	0	0
Turicibacter	0	0	0	0	0	0	0.000359454	0	0.000359454	0.000898634	0.00161754	0	0.00053918	0.000359454	0.000718907	0.000179727	0	0.000359454	0.00143781	0	0.000179727	0	0	0	0	0	0	0	0	0	0.000179727	0.00611071	0.00107836	0	0	0.000898634	0	0	0	0.000359454	0.00107836	0.00341481	0.00988497	0.00682962	0.00053918	0	0.000359454	0.000359454	0.00053918
Tyzzerella	0.00107836	0.00377426	0.00179727	0.00772825	0.00898634	0.00629044	0.00323508	0	0.000718907	0	0	0.000179727	0	0.000359454	0	0	0	0	0	0	0.00359454	0.00664989	0.00125809	0.00754853	0.00629044	0.00161754	0.00449317	0.00053918	0.00611071	0.00485262	0.00647017	0.00287563	0.00395399	0.000898634	0.00125809	0.0046729	0.00682962	0.00557153	0.00197699	0.0026959	0.00197699	0.0046729	0.00359454	0.00323508	0.00323508	0.00233645	0.00251618	0.00179727	0.00053918
Tyzzerella_3	0	0	0	0	0	0	0	0	0	0	0	0	0	0	0	0	0	0	0	0	0	0.000359454	0	0	0	0	0	0	0	0	0	0.00952552	0.000179727	0	0	0	0	0	0	0	0	0	0	0	0.000359454	0.000359454	0	0	0.000179727
uncultured	0.00377426	0.0246226	0.00880661	0.0334292	0.0174335	0.0240834	0.00808771	0.00053918	0.00395399	0.00287563	0.000718907	0.000179727	0.000179727	0.00161754	0.00053918	0	0.000898634	0	0	0.000359454	0.00575126	0.0165349	0.00629044	0.0163551	0.0150971	0.00611071	0.00629044	0.000898634	0.0132998	0.0109633	0.0235442	0.00341481	0.0176132	0.00700935	0.00449317	0.0204889	0.0134795	0.0147376	0.00377426	0.00916607	0.00359454	0.0122214	0.0134795	0.00952552	0.0186916	0.0116822	0.0073688	0.0143781	0.0132998
uncultured_alpha_proteobacterium	0	0	0	0	0	0	0	0	0	0	0	0	0	0	0	0	0	0	0	0	0	0.000179727	0	0	0	0.000179727	0	0	0	0.000179727	0	0	0	0	0	0	0	0	0	0	0	0	0	0	0	0	0	0	0
uncultured_Bacillales_bacterium	0	0	0.000179727	0	0	0	0	0	0	0	0	0	0	0	0	0	0	0	0	0	0	0	0.000179727	0.00053918	0	0	0	0	0.000179727	0.000359454	0	0	0	0	0	0	0	0.000179727	0	0	0	0	0	0	0.000718907	0.000179727	0.000898634	0	0
uncultured_bacterium	0.0053918	0.0246226	0.0276779	0.0102444	0.0902229	0.0248023	0.0499641	0.0199497	0.0391804	0.00125809	0.00754853	0.00107836	0.000359454	0.0122214	0.00143781	0.00053918	0.0265996	0.000359454	0.000359454	0.00125809	0.0278577	0.0452912	0.0377426	0.0208483	0.051941	0.0305536	0.0310927	0.0327103	0.0533789	0.0442128	0.0307333	0.0233645	0.0240834	0.0323508	0.00431344	0.0224659	0.0278577	0.048706	0.00790798	0.00305536	0.0361251	0.0203091	0.0312725	0.034867	0.015816	0.0479871	0.0603882	0.0762042	0.0267793
uncultured_Bacteroidales_bacterium	0.000179727	0.000718907	0.00053918	0.00053918	0.00215672	0.00107836	0.00179727	0.000359454	0.0026959	0.000359454	0.000359454	0.000179727	0	0.00143781	0	0	0.000179727	0	0	0.000179727	0.00143781	0.00053918	0.000898634	0	0.00215672	0.000179727	0.00143781	0.000359454	0.00143781	0.00107836	0.000718907	0.00107836	0.000898634	0.00053918	0.00107836	0.00125809	0.00107836	0.000718907	0	0.000898634	0.00161754	0.000179727	0.00107836	0.000898634	0	0.00233645	0.00125809	0.00197699	0.000718907
uncultured_cyanobacterium	0	0	0	0.000179727	0	0	0	0	0	0	0	0	0	0	0	0	0	0	0	0	0.000179727	0.000179727	0	0	0	0	0.000179727	0.000179727	0.00053918	0.000359454	0	0	0	0	0	0	0.000179727	0	0	0	0	0	0	0	0.000179727	0	0	0.000179727	0
uncultured_Erysipelotrichi_bacterium	0	0	0	0	0	0	0	0	0	0	0	0	0	0	0	0	0	0	0	0	0	0	0	0	0	0	0	0	0	0	0	0	0	0	0	0	0	0	0	0	0	0	0	0	0.000359454	0	0	0	0
uncultured_organism	0	0	0.000179727	0	0.000359454	0	0.000179727	0.000179727	0.000179727	0	0	0	0	0	0	0	0	0	0	0	0	0	0	0	0	0	0	0	0	0	0.000359454	0	0	0	0	0	0	0.000179727	0	0	0.000179727	0.000179727	0	0.00053918	0	0.00053918	0.000179727	0	0
uncultured_Paenibacillaceae_bacterium	0	0	0	0	0	0	0	0	0	0	0	0	0	0	0	0	0	0	0	0	0	0	0	0	0	0	0	0	0.000179727	0	0	0	0	0.000179727	0	0	0	0	0	0	0	0.000898634	0.000179727	0.00053918	0	0	0	0	0
uncultured_prokaryote	0	0	0	0	0.000359454	0	0	0	0	0	0	0	0	0	0	0	0	0	0	0	0	0	0	0	0	0.000359454	0	0	0	0	0	0	0	0	0	0	0.000179727	0.000179727	0	0	0	0	0	0	0	0	0.000179727	0	0
uncultured_rumen_bacterium	0	0.0026959	0.00053918	0.000718907	0.000359454	0.00053918	0.000359454	0	0.00107836	0	0.000898634	0.000898634	0	0.00143781	0	0	0.00287563	0	0.000179727	0	0.00053918	0.00377426	0.000359454	0.00485262	0.000898634	0.00557153	0.00395399	0.00125809	0.0104242	0.00323508	0.00107836	0	0.000718907	0.00161754	0.000179727	0.000179727	0.00233645	0.00053918	0	0	0.0026959	0.00125809	0.00305536	0.00395399	0.00161754	0.00323508	0.00521208	0.00395399	0.00359454
unidentified	0.00125809	0.00323508	0.000898634	0.00107836	0.0046729	0.00323508	0.00125809	0.00161754	0.00377426	0.000179727	0.00107836	0	0	0.000898634	0	0	0.00053918	0	0	0	0.00125809	0.00521208	0.00179727	0.00359454	0.00503235	0.00395399	0.00161754	0.00305536	0.00844716	0.00611071	0.00503235	0.00143781	0.00053918	0.00772825	0	0.00179727	0.00593098	0.00808771	0.00161754	0	0.00664989	0.0120417	0.0106039	0.00808771	0.00682962	0.00700935	0.00359454	0.00449317	0.0046729
Vagococcus	0	0	0	0	0	0	0	0	0	0	0.00700935	0.00251618	0.00251618	0.00287563	0.000179727	0.00053918	0.00341481	0.000718907	0.000718907	0.00143781	0	0	0	0	0	0	0	0	0	0	0	0	0	0	0	0	0	0	0	0	0	0	0	0	0	0	0	0	0
Victivallis	0	0.000359454	0	0	0	0	0	0.000179727	0.000359454	0	0	0	0	0	0	0	0	0	0	0	0	0	0	0	0	0.00053918	0	0	0.000359454	0	0.000179727	0	0	0	0	0	0	0.000359454	0	0	0	0	0	0.000179727	0	0	0	0	0
Other	0.299245	0.558771	0.290798	0.569195	0.56578	0.47394	0.340942	0.255392	0.225018	0.312006	0.159238	0.317937	0.335191	0.231668	0.129583	0.207225	0.121675	0.28936	0.26995	0.240115	0.3422	0.571172	0.478253	0.647017	0.642344	0.553379	0.459202	0.335191	0.522646	0.623832	0.49317	0.557333	0.542595	0.612509	0.213156	0.560748	0.503235	0.451833	0.689073	0.5	0.547088	0.569914	0.696981	0.584292	0.528217	0.670022	0.683861	0.642883	0.691769
[truncated: 1 more columns]
